# Supplementary material for: Lower Rates of Heart Failure and All-Cause Hospitalizations During Pulmonary Artery Pressure-Guided Therapy for Ambulatory Heart Failure: One-Year Outcomes From the CardioMEMS Post-Approval Study
Source: PubMed Central journal article supplement — Circ Heart Fail. 2020 Aug 6;13(8):e006863. doi: 10.1161/CIRCHEARTFAILURE.119.006863 (PMC7434214; doi:10.1161/circheartfailure.119.006863), 2020-08-06
Supplement: hhf-13-e006863-s001.pdf [file hhf-13-e006863-s001.pdf]

1 **SUPPLEMENTAL MATERIAL**

2  
3 **Supplemental Methods**

4  
5 **Study Protocol**

6  
7 All subjects will be followed for 2 years. A subject is considered to have successfully completed the  
8 study upon completion of the 2-year visit.

9  
10 During the screening visit, the following procedures/assessments will be performed to determine  
11 subject eligibility:

- 12 • Informed Consent prior to the conduct of any study-related procedures
- 13 • Physical examination including vital signs (temperature, heart rate, respiratory rate, blood  
14 pressure), weight, height, body mass index
- 15 • Medical and surgical history including ejection fraction data must be taken within the last 3  
16 months
- 17 • Patient history of heart failure hospitalizations in the 12 months previous to the baseline visit as  
18 documented in information provided by the patient's cardiologist, internist, or referring  
19 physicians and review of all source documents of any heart failure hospitalization(s) reported in  
20 the previous year
- 21 • Demographics
- 22 • NYHA Functional Classification
- 23 • Calculation of glomerular filtration rate (GFR)
- 24 • Assessment of medications
- 25 • Kansas City Cardiomyopathy Questionnaire-12 (KCCQ-12)
- 26 • Brief Illness Perception Questionnaire
- 27 • Cardiac Health Security Survey
- 28 • Assessment of enrollment eligibility (inclusion/exclusion criteria)

29  
30 The study coordinator or designee will administer patient-reported outcome questionnaires. It is  
31 important that the subject understands the meaning of all words and instructions in each questionnaire  
32 and answers all the questions. The subject will be instructed to ask any questions about the  
33 questionnaire if further explanation is needed. The research coordinator or designee will review the  
34 questionnaires to verify that all questions have been answered. The measures used will be the Kansas  
35 City Cardiomyopathy Questionnaire-12 (KCCQ-12), the Brief Illness Perception Questionnaire, and the  
36 Cardiac Health Security Survey. The Patient Reported Outcomes will be obtained at screening and each  
37 follow up visit post-implant (with the exception of the 1-month follow-up visit) for 2 years. Patients who  
38 were enrolled in the study prior to addition of patient reported outcome questionnaires, and therefore  
39 did not complete baseline questionnaires, are not required to complete questionnaires at the follow-up  
40 visits.

41  
42 Eligible subjects will be scheduled for the Implant procedure. Subjects on anticoagulation therapy (e.g.  
43 warfarin) may be instructed by the Investigator to discontinue use 1-2 days prior to pressure sensor  
44 placement. The investigator should consider utilizing enoxaparin (Lovenox) per the site's standard of  
45 care as bridge therapy to Sensor placement in subjects who were on anticoagulation therapy. For  
46 subjects at risk for gastro-intestinal bleeding during the period in which dual antiplatelet therapy is  
47 given, the investigator should consider a proton pump inhibitor such as omeprazole (Prilosec). Subjects

1 at risk include the elderly, those with a history of gastroduodenal ulcers, gastroesophageal reflux  
2 disease, esophagitis, intestinal polyps or cancer. Subjects who smoke or who are using steroids or  
3 nonsteroidal anti-inflammatory drugs may also be at risk.

#### 4 5 Right Heart Catheterization (RHC) and Implant Procedure (Baseline Visit)

6 Before the RHC, the following procedures/assessments will be performed:

- 7 • Abbreviated physical examination (i.e., vital sign assessments and significant changes since  
8 Screening Visit) and weight
- 9 • Confirmation of enrollment eligibility (other than angiographic criteria)
- 10 • PT/PTT with International Normalized Ratio (INR) of 1.5 or less for subjects previously on  
11 warfarin
- 12 • Assessment of heart failure medications
- 13 • Record any medical history updates since screening visit.

14  
15 The patient will then undergo a standard RHC. A selective, hand injected pulmonary angiogram will be  
16 performed via the pulmonary artery catheter to identify a suitable pulmonary artery branch for sensor  
17 implantation. Subjects must have an appropriately sized ( $\geq 7$ mm diameter) pulmonary artery branch.

18  
19 Subjects who do not meet this inclusion criteria will not receive the PA Sensor implant and will be  
20 considered ineligible for the study. These subjects will be documented as consented not implanted and  
21 will be followed for 30 days for safety. Patients with a suitable target pulmonary artery branch will  
22 undergo:

- 23 • Wireless implantable hemodynamic sensor implant
- 24 • Pulmonary artery catheter measurements (pulmonary systolic, pulmonary diastolic, pulmonary  
25 mean, cardiac output) done 3 times consecutively with sensor measurements for setting of  
26 sensor baseline.
- 27 • Provide post-procedure vascular access site care per standard procedure
- 28 • At the Investigator's discretion, subjects should be discharged once stable with respect to the  
29 procedure and their heart failure.
- 30 • Please see User's Manual for implant details

31  
32 Subjects who are currently on anticoagulant therapy (warfarin, or any FDA approved anticoagulant) will  
33 restart treatment. The subject's INR should be checked periodically to ensure that it is in the therapeutic  
34 range. Those subjects not on chronic warfarin will be placed on anticoagulant/antiplatelet therapy as  
35 indicated in the device User's Manual.

#### 36 37 Study Follow-Up Visits 1, 2, 3, 4, and 5 (Months 1, 6, 12, 18, and 24)

38 Implanted subjects will be evaluated at Month 1 ( $\pm 7$  days) and at Months 6, 12, 18, and 24 ( $\pm 30$  days)  
39 and the following procedures/assessments will be performed:

- 40 • Updated medical and surgical history
- 41 • Assessment of AEs that occurred since the last visit
- 42 • Abbreviated physical examination (significant changes since previous visit) including vital signs  
43 (heart rate, respiratory rate, blood pressure), and weight
- 44 • Assessment of NYHA functional class
- 45 • Kansas City Cardiomyopathy Questionnaire (KCCQ-12)
- 46 • Brief Illness Perception Questionnaire
- 47 • Cardiac Health Security Survey

- 1 • Heart failure medication review
- 2 • PA pressure measurements may be obtained at the Investigator's discretion

3  
4 Subjects will be reminded to obtain pulmonary artery pressure measurements utilizing the  
5 CardioMEMS™ HF System as directed. Subjects will be reminded of the current ACC/AHA guidelines  
6 regarding sodium and fluid restrictions. The study coordinator or designee will administer patient-  
7 reported outcome questionnaires. It is important that the subject understands the meaning of all words  
8 and instructions in each questionnaire and answers all the questions. The subject will be instructed to  
9 ask any questions about the questionnaire if further explanation is needed. The research coordinator or  
10 designee will review the questionnaires to verify that all questions have been answered. The Patient  
11 Reported Outcomes will be obtained at 6, 12, 18 and 24 months. Patients who were enrolled in the  
12 study prior to addition of patient reported outcome questionnaires, and therefore did not complete  
13 baseline questionnaires are not required to complete questionnaires at the follow-up visits.

#### 14 15 Subject Home PA Pressure Readings

16 Prior to hospital discharge, subjects will be instructed on how to take their own pulmonary artery  
17 pressure measurements, utilizing the CardioMEMS™ HF System. Subjects will provide returned  
18 demonstration on: setting up the unit, connecting the system to a phone line, proper positioning for  
19 obtaining the optimum sensor signal, taking and transmitting the daily pressure measurements. The unit  
20 will transmit the data to a database using the system's modem. The home measurements will be taken  
21 while the subject is lying down (supine) in bed positioned on a padded, flat antenna. It is recommended  
22 that subjects obtain home measurements in a supine position however, if the subject is unable to lie  
23 flat, measurements can be obtained in a sitting or reclined position. It is important the anatomical  
24 position is consistent for every measurement. The home electronics system is small enough for  
25 placement on a bedside table. The unit will provide audio and visual prompts for the subject to guide  
26 them through signal acquisition. Once the subject is positioned and a signal is acquired, the subject will  
27 be notified of the successful reading and the data is automatically transmitted to a remote database. St.  
28 Jude Medical will provide instructions for use and a help line will be available. Please refer to subject's  
29 Patient System Guide for more detailed information.

#### 30 31 PA Pressure Readings in the Hospital

32 If a subject is hospitalized, seen in the emergency room (ER) or has a clinic visit, the CardioMEMS™ HF  
33 System may be used to obtain pulmonary artery pressure measurements at the investigators discretion.  
34 Following sensor implant, subsequent RHC procedures or pulmonary artery catheter insertions must be  
35 performed under fluoroscopic guidance. Resetting of the sensor baseline will be performed as deemed  
36 necessary by Sponsor. Baseline resetting may require an echocardiogram or a RHC procedure.  
37 Following the sensor implant, should a RHC procedure or PA catheter evaluation be clinically warranted,  
38 comparative pulmonary artery pressures utilizing the CardioMEMS™ HF System should also be obtained  
39 utilizing the hospital electronics unit.

#### 40 41 Criteria for Withdrawal

42 Subjects may be withdrawn from the study for any of the following reasons:

- 43 1. Subject withdraws his/her consent ('withdrew consent').
- 44 2. Investigator determines that other treatment is warranted to protect the health and safety of the  
45 Subject ('terminated by investigator').
- 46 3. Investigator determines that the subject is noncompliant with study related procedures ('terminated  
47 by investigator').
- 48 4. Subject is lost to follow-up: site must document attempts made to contact the subject for an early

1 discontinuation visit (e.g., 2 – 3 phone calls, followed by 1 certified letter, documentation of repetitive  
2 missed study visits, etc.) ('lost to follow up').

3 5. Other – other reasons for withdrawal from study not classified into the above categories ('other').

4 The Investigator will notify the Sponsor and document on the appropriate case report form (CRF) the  
5 reason/circumstances for early discontinuation. All subjects who withdraw from the study should have  
6 the following study exit procedures performed if possible:

- 7 • Updated medical and surgical history
- 8 • Assessment of AEs that occurred since the last visit
- 9 • Abbreviated physical examination (only significant changes since Enrollment) including vital  
10 signs (temperature, heart rate, respiratory rate, blood pressure), and weight
- 11 • Assessment of NYHA functional class
- 12 • Kansas City Cardiomyopathy Questionnaire (KCCQ-12)
- 13 • Brief Illness Perception Questionnaire
- 14 • Cardiac Health Security Survey
- 15 • Heart failure Medication Review
- 16 • PA pressures may be obtained at the Investigator's discretion

17  
18 All reasonable efforts should be made to retain subjects in the clinical trial until its completion. If a  
19 patient moves from the geographic area of their investigator, St. Jude Medical will attempt to place the  
20 patient with another investigator.

1 **Definitions for Hospitalization and Adverse Events**

2  
3 Hospitalization – hospitalizations are defined as greater than or equal to 24 hours in a hospital (includes  
4 admissions, emergency room visits, and observations). If time is not present or obvious then a calendar  
5 date change will be utilized

6  
7 Heart Failure – Patients must be admitted for heart failure or heart failure must be the primary reason  
8 for hospitalization. Criteria must include both of the following:

- 9 A. Signs and symptoms of heart failure on hospitalization,  
10  
11 B. The use of intravenous diuretic, vasodilator, inotropic, or ultrafiltration therapy for the  
12 purposes of treating heart failure. The augmentation of oral therapy may be allowable for  
13 defining the hospitalization as heart failure, if no other reasonable diagnosis can be  
14 attributed to the hospitalization.

15 Heart failure hospitalizations can be categorized into 2 major categories on the basis of  
16 perfusion (adequate or inadequate). The inadequate perfusion group can then be  
17 subdivided into 2 categories on the basis of volume.

18 1. Hypervolemia (Congestion):

19 Patients with signs and/or symptoms of congestion or volume overload. The most  
20 frequent hospitalizations are for hypervolemic congestion, often referred to as “wet  
21 and warm”, these patients have adequate perfusion and cardiac output is relatively  
22 preserved. These patients typically have elevated filling pressures or PCWP.  
23 Therapy usually includes diuretics and vasodilators. These hospitalizations are  
classified as Hypervolemic.

24 2. Low Output with Hypervolemia, Hypovolemia or Euvolemia:

- 25 a. Normal/Low volume: The low perfusion and normal or low volume patients,  
26 often referred to as “cold and dry”, are clinically manifested by the absence of  
27 signs of congestion, no elevation of JVP, no edema, ascites, or rales. They  
28 usually exhibit low BP, renal insufficiency, decreased urine output and possibly  
29 decreased mentation. They are generally treated with fluids to raise filling  
30 pressures in order to generate an adequate output and may also require  
31 inotropes. These patients may cross over into “cold and wet” category after  
32 they receive fluids. These hospitalizations are classified as Low output with  
33 normal or low volume.
- 34 b. Volume Overload: The low perfusion and congested patients, often referred to  
35 as “cold and wet”, have a decrease in perfusion usually exhibited by low BP,  
36 renal insufficiency, decreased urine output and possibly decreased mentation  
37 with associated signs of congestion - volume overload, edema, rales. They are in  
38 or near cardiogenic shock and usually require a combination of inotropes and  
39 diuretics, as well as consideration for mechanical support (IABP, LVAD) and  
40 possibly transplant. These hospitalizations are classified as Low output with  
41 volume overload.

42 3. Complications of heart failure therapies:

- 43 a. Over diuresis – result of diuretics or any other therapy used in the treatment of  
44 hypervolemia (i.e. ultrafiltration, dialysis, etc.)

- 1 b. Other – pharmacologically induced (i.e. ACE, ARB, Beta Blocker) complications  
2 or non-pharmacologic (i.e. CRT device complications, etc.)  
3

4 Adverse Events (AE)

5 An AE is any untoward medical occurrence (e.g., noxious or pathological changes) in a subject compared  
6 with pre-existing conditions that may occur during any part of the clinical study. An AE is defined as  
7 being independent of assumption of any causality (e.g., primary or concomitant disease or study design).  
8

9 Serious Adverse Event (SAE)

10 For this study, an SAE is defined as any untoward medical occurrence that: results in death, is  
11 immediately life-threatening – an event in which the subject was at risk of death at the time of the  
12 event, requires admission and hospitalization (> 24 hours) or prolongation of existing hospitalization,  
13 results in disability/incapacity, results in a congenital anomaly/birth defect, requires intervention to  
14 prevent one of the above. The cause of death of any subject after enrollment must be documented on  
15 the AE CRF and reported as an SAE. The information should include the date expired, cause of death,  
16 and what attempts were made to treat the condition.  
17

18 Device-Relatedness

19 An AE or SAE that is definitely or possibly related to the device or the insertion procedure should be  
20 considered device-related. A serious adverse device effect (SADE) is an event that meets any of the  
21 above SAE criteria and is considered related to the device or the insertion procedure by the Investigator.  
22 All other events considered related to the device or insertion procedure are non-serious adverse device  
23 effects (ADEs).  
24

25 Anticipated AEs

26 Events associated with the CardioMEMS™ PA Sensor or the implant procedure (in conjunction  
27 with RHC) or post-implantation complications are considered anticipated and include the following:  
28 infection, upper respiratory infection, bronchitis, pneumonia, acute bronchitis, groin abscess,  
29 methicillin-resistant staphylococcal aureus infection, pulmonary infiltration, sepsis, arrhythmias,  
30 ventricular tachycardia, atrial fibrillation, ventricular arrhythmia, ventricular fibrillation, atrial fibrillation  
31 with rapid ventricular response, atrial flutter, cardiac dysrhythmias, tachycardia, wide complex  
32 tachycardia, bleeding, epistaxis, hemoptysis, gastrointestinal bleed, bleeding, blood in stool, catheter  
33 site bleeding, catheter site ecchymosis, hematuria, nose bleeds, hematoma, catheter site hematoma,  
34 vessel puncture site hematoma, thrombus, arterial thrombosis (limbs), blood clot, myocardial infarction,  
35 transient ischemic attack, stroke, death, sensor embolization and pulmonary artery perforation.  
36

37 Anticipated ADEs/SADEs

38 The following is a list of possible anticipated ADEs/SADEs: hemoptysis, sensor not deploying, transient  
39 ischemic attack, atypical chest pain, sepsis leading to death, atrial arrhythmia leading to death, arterial  
40 embolism (upper extremity), PA (in-situ) thrombus, catheter site bleeding, catheter site ecchymosis,  
41 catheter site hematoma, vessel puncture site pain, cardiac monitoring abnormal, heart rate irregular,  
42 serum creatinine increased, dyspnea, congestive heart failure, ventricular tachycardia, dizziness, vessel  
43 perforation, sensor failure/malfunction and sensor migration.  
44  
45  
46

1 Other events

2 Pulmonary embolism – Pulmonary embolism will be diagnosed with confirmation by high probability  
3 V/Q scan, angiography, Spiral CT, or autopsy with or without acute onset of dyspnea, pleuritic chest  
4 pain, hypoxia, or hemodynamic dysfunction.

5 Pulmonary infarct – Radiographic evidence of pulmonary lesion diagnosed as infarction usually  
6 associated with pulmonary embolism

7  
8 Myocardial Infarction – The term myocardial infarction should be used when there is evidence of  
9 myocardial necrosis in a clinical setting consistent with myocardial ischemia. Under these conditions  
10 any one of the following criteria meets the diagnosis for myocardial infarction:

- 11 • Detection of rise and/or fall of cardiac biomarkers (preferably troponin) with at least one value  
12 above the 99<sup>th</sup> percentile of the upper reference limit (URL) together with evidence of  
13 myocardial ischemia with at least one of the following: symptoms of ischemia; ECG changes  
14 indicative of new ischemia (new ST-T changes or new left bundle branch block [LBBB]);  
15 development of pathological Q waves in the ECG; imaging evidence of new loss of viable  
16 myocardium or new regional wall motion abnormality.
- 17 • For percutaneous coronary interventions (PCI) in patients with normal baseline troponin values,  
18 elevations of cardiac biomarkers above the 99<sup>th</sup> percentile URL are indicative of peri-procedural  
19 myocardial necrosis. By convention, increases of biomarkers greater than 3 x 99<sup>th</sup> percentile  
20 URL have been designated as defining PCI-related myocardial infarction. A subtype related to a  
21 documented stent thrombosis is recognized.
- 22 • For coronary artery bypass grafting (CABG) in patients with normal baseline troponin values,  
23 elevations of cardiac biomarkers above the 99<sup>th</sup> percentile URL are indicative of peri-procedural  
24 myocardial necrosis. By convention, increases of biomarkers greater than 5 x 99<sup>th</sup> percentile  
25 URL plus either new pathological Q waves or new LBBB, or angiographically documented new  
26 graft or native coronary artery occlusion, or imaging evidence of new loss of viable myocardium  
27 have been designated as defining CABG-related myocardial infarction.
- 28 • In addition, the following general considerations will also be used to evaluate events with  
29 elevated troponins (Januzzi JL, *et al. Eur Heart J* 2012; 33, 2265–2271). Troponins should be  
30 interpreted within the context of the specific clinical presentation in which they are measured;  
31 in patients with HF, there are numerous causes for circulating troponin concentrations above  
32 the 99<sup>th</sup> percentile, including coronary and non-coronary mechanisms. The recognition of a  
33 troponin that is above the 99<sup>th</sup> percentile and its rising and/or falling does not absolutely  
34 indicate the presence of a Type I MI.

35  
36 Coronary Insufficiency/Acute Coronary Syndrome/Unstable angina – Criteria must include all of the  
37 following: Ischemic symptoms upon presentation with hospitalization; cardiac markers not indicative of  
38 MI; treatment for acute coronary syndrome including some of the following: ASA, heparin, nitrates,  
39 GpIIb/IIIa inhibitors, percutaneous coronary intervention, etc.; a positive diagnostic test for coronary  
40 artery disease or prior known history of CAD; a discharge diagnosis of acute coronary syndrome or  
41 unstable angina.

42  
43 Atrial dysrhythmia – Typical ECG findings

44  
45 Ventricular dysrhythmia – Typical ECG findings

46  
47 Bradycardia/Heart block – Typical ECG findings

1 Syncope – classified as vasovagal, iatrogenic or other in etiology.  
2  
3 Stroke – Defined as a new, non-traumatic, primary focal neurological deficit that is sudden in onset,  
4 thought to be vascular in origin, lasting at least 24 hours, and is ideally associated with CT or MRI  
5 abnormalities of the brain.  
6  
7 Transient Ischemic Attack (TIA) – A transient ischemic attack is defined as a focal neurologic deficit,  
8 presumed vascular in origin, which lasts for less than 24 hours, without new findings on CT, MRI. Any  
9 new clinically relevant DWI MRI abnormality that cannot be confirmed by CT or T1/T2 MRI and is  
10 associated with a focal neurological deficit lasting less than 24 hours is also classified as a TIA. A  
11  
12 Reversible Ischemic Neurological Defect (RIND) is also classified as a TIA. Post-seizure neurological  
13 deficits will not be classified as a TIA.  
14  
15 Peripheral vascular disease – Hospitalization occurring from peripheral vascular disease or its  
16 complications such as gangrene and extremity amputation. Does not include hypoperfusion of heart  
17 failure.  
18  
19 Vascular embolism – Hospitalization occurring due to emboli to other vascular beds.  
20  
21 Aortic Aneurysm – Hospitalization occurring from a thoracic or abdominal aortic aneurysm or dissection  
22 and supported by appropriate imaging data.  
23  
24  
25  
26  
27  
28  
29  
30  
31  
32  
33  
34  
35  
36  
37  
38  
39  
40  
41  
42  
43  
44  
45  
46  
47  
48



## 1 Management of Hemodynamic Parameters

2  
3 The CardioMEMS™ HF System allows intermittent assessment of pulmonary artery (PA) systolic, diastolic  
4 and mean pulmonary artery pressures. Hemodynamic information obtained by the system should be  
5 used for clinical decision making in addition to symptoms, weights or physical examination (traditional  
6 markers of volume). Normal PA pressure ranges are established as: PA Systolic 15 - 35 mmHg; PA  
7 Diastolic 8 - 20 mmHg and PA Mean 10 - 25 mmHg.

8  
9 Initially, thresholds will be set automatically at the acceptable range. The physician can adjust the  
10 thresholds specifically for each patient. These threshold notifications are intended to guide the physician  
11 to review the CardioMEMS™ HF Website. Every attempt should be made to keep the PA pressures  
12 within the specified PA pressure ranges utilizing the guidelines. In order to clinically manage the  
13 patient's PA pressures, the physician must review the PA pressure measurements on a frequent basis,  
14 for example, some patients may require a daily review of their PA pressure measurements, while some  
15 patients may need a weekly review. The physician or designee has unlimited access to the  
16 CardioMEMS™ HF Website.

17  
18 An elevation of pressures beyond the patient's pressure ranges should be considered a volume  
19 overloaded status and should be managed according to the hyper-volemic guidelines (see below).  
20 Diuretics and vasodilators should be adjusted based on the patient's baseline diuretic requirement,  
21 knowledge of the patient's prior response to these agents, and clinician judgment to accomplish the  
22 pressure goals set forth in this guideline. A decrease in the pulmonary pressures below the patient's  
23 pressure ranges should be considered a volume depletion event and managed according to the hypo-  
24 volemia guidelines (see below) (see below). Diuretic therapy should be held and the chronic dose should  
25 be lowered. In addition to these specific guidelines, the physician should also incorporate the  
26 recommendations set forth in the ACC/AHA 2013 Guidelines for the Diagnosis and Management of  
27 Heart Failure in the Adult. The PA pressure readings should be used in addition to weights, signs and  
28 symptoms, laboratory values and other traditional markers of volume in the management of heart  
29 failure. It is important to review the trend of PA pressures. As with all other diagnostic information,  
30 physicians should consider the entire medical history of each patient when initiating or modifying  
31 therapies.

### 32 Elevated PA Pressures (Hyper-volemic)

#### 33 Hyper-volemic Definitions

- 34 • Subject symptoms: Congestive symptoms (wet)
- 35 • CardioMEMS™ HF System Parameters: above the acceptable range
- 36 • Daily trends: elevated trend data outside the acceptable range
- 37 • Weekly trends: elevation in trend data

#### 38 Treatment Recommendations

- 39 • Add or increase diuretic (and appropriate electrolyte replacement)
- 40 a. Increase or add loop diuretic
- 41 b. Change to another loop diuretic
- 42 c. Add thiazide diuretic (with caution)
- 43 d. IV doses of loop diuretic
- 44 e. Serum electrolyte evaluation with change in baseline medication
- 45 f. Re-assess pulmonary artery pressure utilizing the CardioMEMS™ HF System at least 2 – 3 days
- 46 per week until optivolemic

1  
2  
3  
4  
5  
6  
7  
8  
9  
10  
11  
12  
13  
14  
15  
16  
17  
18  
19  
20  
21  
22  
23  
24  
25  
26  
27  
28  
29  
30  
31  
32  
33  
34  
35  
36  
37  
38  
39  
40  
41  
42  
43  
44  
45  
46  
47

- Add or increase vasodilators including long-acting nitrates
- Re-educate in salt intake and fluid restriction
- If subject has signs and symptoms of poor perfusion (cold) in addition to being hypervolemic:
  - a. Consider admission if clinical evidence suggests need for IV diuretics, telemetry monitoring or the IV therapeutic agents
  - b. Consider invasive hemodynamic monitoring for determination of Cardiac Output, if indicated

Low PA Pressures (Hypo-volemic)

Hypo-volemic Definitions

- Subject symptoms: poor perfusion in absence of signs and symptoms of congestion
- CardioMEMS™ HF System Parameters: below the acceptable range
- Daily trends: decrease in trend data outside the acceptable range
- Weekly trends: decrease in trend data

Treatment Recommendations

- Lower or discontinue diuretic
  - a. If on a thiazide diuretic with loop diuretic, lower or discontinue the dose of thiazide (and adjust electrolyte replacement)
  - b. If on only loop diuretic, lower the dose or discontinue
  - c. Consider liberalization of oral fluid restriction and salt restriction
- If postural hypotension, hold or lower vasodilators and/or oral nitrates, especially if hypotensive when sitting or supine
- If worsening renal function, hold or lower ACE/ARB dose, especially if hypotensive
- If subject had signs and symptoms of poor perfusion (cold) in addition to being hypovolemic:
  - a. Consider admission if clinical evidence suggests need for IV fluid repletion, telemetry monitoring or the use of IV therapeutic agents
  - b. Consider invasive hemodynamic monitoring for determination of Cardiac Output, if indicated

1 **Statistical Analysis Plan**

2

3 Data was summarized using univariate statistics (e.g., N, mean, standard deviation) or frequency (e.g., N,  
4 %) as appropriate. The primary time point for safety analyses is 24 months post enrollment. Enrollment  
5 was defined as having a successful sensor implant. The primary time point for effectiveness analyses was  
6 12- months post enrollment. Unless otherwise specified, all statistical tests were 2-sided with a  
7 significance level of 0.05.

8

9 Populations for Analysis

10 Safety Population: The Safety Population consists of all subjects who received a sensor implant or  
11 underwent the implant procedure but were never implanted, regardless of study completion status. All  
12 safety analyses were performed on the Safety population. Subjects who were found not to have an  
13 appropriately sized pulmonary artery branch and did not receive the Sensor implant were considered  
14 ineligible for the study. However, these subjects were followed for 30 days for safety and all safety  
15 related data for these subjects is provided.

16

17 Effectiveness Population: The effectiveness population consists of all subjects who received a Sensor  
18 implant regardless of study completion status. All effectiveness analyses were performed on the  
19 effectiveness population.

20

21 Missing Data

22 Missing data was tracked in the Electronic Data Capture system. Queries were generated and  
23 provided to the site. In addition, a St. Jude Medical representative, or designee routinely performed  
24 monitoring visits at each site. During the monitoring visits, missing data queries were addressed until  
25 resolution. Missing data that were not resolved were not imputed unless specified in the sections below.  
26 Descriptive summaries were generated to describe the disposition of all enrolled subjects.

27

28 Safety Analyses

29 The safety analyses were performed using the Safety Population. The data was summarized using  
30 univariate statistics (e.g., N, mean, standard deviation) or frequency (e.g., N, %) as appropriate.

31

32 Primary Safety Endpoints

33 The primary safety analyses was based on the following objective performance criteria: a) the lower  
34 limit of the two-sided 95% confidence interval on the freedom from device / system-related  
35 complication rate at 24 months is greater than 80% and b) the lower limit of the two-sided 95%  
36 confidence interval on the freedom from pressure sensor failure rate at 24 months is greater than 90%.  
37 These primary safety endpoints were tested hierarchically in order to control for multiplicity. First, the  
38 freedom from device/system-related complication rate was tested. Given that the result was statistically  
39 significant (i.e.,  $p < 0.050$ ), the freedom from pressure sensor failure rate was tested for significance (i.e.,  
40  $p < 0.050$ ). Criteria for positive safety results were established if both tests of the primary safety analysis  
41 endpoints were statistically significant (i.e.,  $p < 0.050$ ).

42

43 Mathematically stated, the primary safety hypotheses were:

44 a)  $H_0: P(\text{Freedom from device/system-related complications at 24 months}) \leq 80\%$

45  $H_a: P(\text{Freedom from device/system-related complications at 24 months}) > 80\%$

46 b)  $H_0: P(\text{Freedom from pressure sensor failure at 24 months}) \leq 90\%$

47  $H_a: P(\text{Freedom from pressure sensor failure at 24 months}) > 90\%$

48 Plotting and analysis of safety endpoints will also be displayed using Kaplan-Meier methods.

1 Safety was also assessed throughout the study by the frequency of Adverse Events (AEs), Adverse  
2 Device Effects (ADEs), Serious AEs (SAEs), and Serious Adverse Device Effects (SADEs), and device/  
3 system-related complications by relationship to the device via Medical Dictionary for Regulatory  
4 Activities (MedDRA) system organ classification. Physical examination, and subject survival data through  
5 12 months was tabulated across study period assessments.

#### 6 7 Effectiveness Analyses

8 Effectiveness analyses were conducted in the effectiveness population. The data was summarized  
9 using univariate statistics (e.g., N, mean, standard deviation, median, minimum and maximum) or  
10 frequency (e.g., N, %) as appropriate.

#### 11 12 Primary Effectiveness Endpoint

13 The primary time point for analyses was 12-months post-enrollment. The primary effectiveness  
14 endpoint was to compare the annualized HF hospitalization rate parameter,  $\gamma$ , at 1-year versus the HF  
15 hospitalization rate in the year prior to enrollment using a two-sample, two-sided Poisson confidence  
16 interval. Criteria to meet the primary effectiveness endpoint was established as two-sided, upper 95%  
17 confidence interval for the PAS rate parameter less than that in the year prior to enrollment.

18  
19 Mathematically stated, the primary effectiveness hypothesis was:

20  $H_0: \lambda$  (12-month HF Hospitalization Rate)  $\geq \lambda$  (HF hospitalization rate in year prior to enrollment)

21  $H_a: \lambda$  (12-month HF Hospitalization Rate)  $< \lambda$  (HF hospitalization rate in year prior to enrollment)

22 where  $\lambda$  (12-month HF Hospitalization Rate) = the HF hospitalization rate parameter at 1-year in the PAS  
23 and  $\lambda$  (HF hospitalization rate in year prior to enrollment) = the HF hospitalization rate in the year prior  
24 to enrollment.

#### 25 26 Supplemental Analyses

27 In addition to the primary safety and effectiveness endpoints, several additional analyses were pre-  
28 specified as outlined below.

#### 29 30 Mortality

31 Plotting and analysis of survival data will be displayed using Kaplan-Meier methods at 12 months.

#### 32 33 Heart Failure Hospitalization (HFH) or Death

34 The annualized HFH or death rate parameter at 1 year was compared to the HFH rate in the year prior  
35 to enrollment using an Andersen-Gill method for recurrent events and robust sandwich variances to  
36 account for within-subject correlation. Criteria for the establishing the effectiveness endpoint was two-  
37 sided, upper 95% confidence interval for the hazard ratio (HR) less than 1.0.

#### 38 39 Patient Compliance

40 Patient device usage over the course of the trial was examined. The total number of PAP readings taken  
41 were reported as a percentage of patient days at home.

#### 42 43 Medication Changes in Response to PA Pressure

44 Medication changes in response to PA pressure on a per-subject basis and a per-medication changes basis  
were evaluated at 1-year follow-up.

1 Training Evaluation

2 To assess the effectiveness of the training program, the safety and effectiveness results were reported  
3 for: (1) Academic Hospitals and (2) Community Hospitals

4 Subgroup Analyses

5 The effectiveness analyses were evaluated in each of the following subgroups: (1) Women, (2) Men, (3)  
6 Reduced Ejection Fraction (< 40%), (4) Preserved Ejection Fraction (≥ 40%), (5) Ischemic Etiology, (6) Non-  
7 ischemic Etiology, (7) With ICD/CRT-D and (8) Without ICD/CRT-D

8  
9  
10  
11  
12  
13  
14  
15  
16  
17  
18  
19  
20  
21  
22  
23  
24  
25  
26  
27  
28  
29  
30  
31  
32  
33  
34  
35  
36  
37  
38  
39  
40  
41  
42  
43  
44  
45

1 **Supplemental Tables**

2

3 Supplemental Table 1 below compares the characteristics of those that were withdrawn prior to 1-year  
 4 (n=79), those that did not survive to 1-year (n=187) and those that did survive to 1-year (n=934).

5

6 **Supplemental Table 1.** Baseline characteristics, medical therapy, baseline hemodynamics and  
 7 ambulatory hemodynamics in patients stratified by 1-year status.

8

|                                                         | Withdrawn<br>Prior to 1 Year<br>N=76 | Died<br>Prior to 1 year<br>N=186 | Survived<br>to 1 year<br>N=938 |
|---------------------------------------------------------|--------------------------------------|----------------------------------|--------------------------------|
| Age, mean (SD), y                                       | 69 (14)                              | 74 (10)                          | 69 (12)                        |
| Men                                                     | 52 (68.4)                            | 137 (73.7)                       | 557 (59.6)                     |
| Women                                                   | 25 (31.6)                            | 50 (26.7)                        | 377 (40.4)                     |
| Race/ethnicity                                          |                                      |                                  |                                |
| White                                                   | 70 (88.6)                            | 165 (88.2)                       | 758 (81.2)                     |
| African American                                        | 6 (7.6)                              | 16 (8.6)                         | 150 (16.1)                     |
| Asian                                                   | 0 (0.0)                              | 3 (1.6)                          | 9 (1.0)                        |
| Other                                                   | 3 (3.8)                              | 3 (1.6)                          | 12 (1.3)                       |
| Ischemic cardiomyopathy                                 | 34 (43.0)                            | 94 (50.3)                        | 368 (39.4)                     |
| CRT or CRT-D device                                     | 17 (21.5)                            | 45 (24.1)                        | 177 (19.0)                     |
| ICD device                                              | 26 (32.9)                            | 59 (31.6)                        | 302 (32.3)                     |
| Comorbidities                                           |                                      |                                  |                                |
| Hypertension                                            | 63 (79.7)                            | 163 (87.2)                       | 823 (88.1)                     |
| Coronary artery disease                                 | 52 (65.8)                            | 141 (75.4)                       | 599 (64.1)                     |
| Diabetes mellitus                                       | 43 (54.4)                            | 105 (56.1)                       | 507 (54.3)                     |
| Chronic obstructive pulmonary disease                   | 32 (40.5)                            | 61 (32.6)                        | 329 (35.2)                     |
| Chronic kidney disease, Stage 3                         | 40 (50.6)                            | 124 (66.3)                       | 530 (56.7)                     |
| Chronic kidney disease, Stage 4                         | 12 (15.2)                            | 27 (14.4)                        | 75 (8.0)                       |
| Medical Therapy                                         |                                      |                                  |                                |
| Beta blocker                                            | 66 (83.5)                            | 160 (85.6)                       | 831 (89.0)                     |
| ACE-I/ARB/ARNi                                          | 35 (44.3)                            | 82 (43.9)                        | 566 (60.6)                     |
| Beta blocker + ACE-I/ARB/ARNi                           | 31 (39.2)                            | 77 (41.2)                        | 528 (56.5)                     |
| Aldosterone agonist                                     | 32 (40.5)                            | 74 (39.6)                        | 423 (45.3)                     |
| Loop diuretic                                           | 79 (100.0)                           | 180 (96.3)                       | 889 (95.2)                     |
| Glomerular filtration rate (mL/min/1.73m <sup>2</sup> ) | 52.3 (23.1)                          | 46.7 (19.8)                      | 54.6 (21.0)                    |
| Baseline Hemodynamics at sensor implant                 |                                      |                                  |                                |
| Systolic blood pressure (mm Hg)                         | 122.2 (22.0)                         | 122.9 (21.6)                     | 127.7 (22.1)                   |
| Heart rate (bpm)                                        | 75.0 (12.2)                          | 73.7 (12.5)                      | 73.8 (12.5)                    |
| Pulmonary capillary wedge pressure (mm Hg)              | 21.0 (9.9)                           | 21.4 (8.4)                       | 19.2 (8.1)                     |
| Pulmonary artery systolic pressure (mm Hg)              | 48.5 (15.6)                          | 52.8 (15.7)                      | 47.0 (14.5)                    |
| Pulmonary artery diastolic pressure (mm Hg)             | 21.1 (8.9)                           | 21.5 (8.1)                       | 19.7 (7.7)                     |
| Pulmonary artery mean pressure (mm Hg)                  | 32.2 (10.5)                          | 34.1 (10.4)                      | 30.7 (9.6)                     |
| Cardiac index (Lit/min/m <sup>2</sup> )                 | 2.2 (0.8)                            | 2.1 (0.7)                        | 2.2 (0.7)                      |
| Ambulatory Hemodynamics during first week               |                                      |                                  |                                |
| Pulmonary artery systolic pressure (mm Hg)              | 49.6 (12.7)                          | 54.2 (13.6)                      | 48.0 (13.7)                    |

|                                             |            |             |             |
|---------------------------------------------|------------|-------------|-------------|
| Pulmonary artery diastolic pressure (mm Hg) | 25.4 (8.4) | 27.1 (9.5)  | 24.2 (8.2)  |
| Pulmonary artery mean pressure (mm Hg)      | 35.2 (9.9) | 37.9 (10.4) | 33.5 (10.1) |

1 CRT- cardiac resynchronization therapy; CRT-D- cardiac resynchronization therapy defibrillation; ICD –  
2 implantable cardiac defibrillator; ACE-I – angiotensin converting enzyme inhibitor; ARB – angiotensin  
3 receptor blocker; ARNi – angiotensin receptor–neprilysin inhibitor.  
4  
5  
6  
7  
8  
9  
10  
11  
12  
13  
14  
15  
16  
17  
18  
19  
20  
21  
22  
23  
24  
25  
26  
27  
28  
29  
30  
31  
32  
33  
34  
35  
36  
37  
38  
39  
40  
41  
42  
43  
44  
45  
46

1 Supplemental Table 2 below compares the heart failure hospitalization (HFH) and all cause  
 2 hospitalization (ACH) 1-year pre implant and 1-year post-implant stratified by baseline mean pulmonary  
 3 artery pressures. Baseline pulmonary artery pressures were stratified as < 25 mm Hg, ≥ 25 mm Hg and <  
 4 35 mm Hg and ≥ 35 mm Hg. HFH 1-year post-implant were consistently lower compared to the 1-year  
 5 pre-implant, regardless of baseline mean PA pressure; all p values <0.0001.  
 6

7 **Supplemental Table 2.** Summary of heart failure hospitalization (HFH) and all cause hospitalization  
 8 (ACH) pre-implant and 1 year post-implant stratified by baseline mean pulmonary artery (PA) pressures.

|            | Baseline Mean<br>PAP < 25<br>(N=211)          | 25 ≤ Baseline<br>Mean PAP < 35<br>(N=435)     | Baseline Mean<br>PAP ≥ 35<br>(N=550)          | All Subjects<br>(N=1200)                       |
|------------|-----------------------------------------------|-----------------------------------------------|-----------------------------------------------|------------------------------------------------|
| <b>HFH</b> | 0.978 vs. 0.295<br>[211]<br>0.30 (0.22, 0.41) | 1.221 vs. 0.519<br>[435]<br>0.43 (0.36, 0.51) | 1.374 vs. 0.649<br>[550]<br>0.47 (0.41, 0.54) | 1.249 vs. 0.535<br>[1200]<br>0.43 (0.39, 0.47) |
| <b>ACH</b> | 2.158 vs. 1.287<br>[211]<br>0.60 (0.48, 0.74) | 2.263 vs. 1.586<br>[434]<br>0.70 (0.63, 0.79) | 2.321 vs. 1.891<br>[550]<br>0.81 (0.74, 0.89) | 2.277 vs. 1.667<br>[1200]<br>0.73 (0.68, 0.78) |

9 <sup>1</sup>Includes all CEC adjudicated Heart Failure hospitalizations with an admission date on the date of implant and through 390 days prior to date of  
 10 implant.

11 <sup>2</sup>Includes all CEC adjudicated Heart Failure hospitalizations with an admission date after the implant procedure discharge date through 390 days  
 12 after the date of implant.

13 <sup>3</sup>Hazard Ratio, 95% Confidence Interval, and p-value estimated from the Andersen-Gill model with robust sandwich estimates.

14 <sup>4</sup>Hospitalization Rate is an annualized rate estimated from the Andersen-Gill model.

15  
16  
17  
18  
19  
20  
21  
22  
23  
24  
25  
26  
27  
28  
29  
30  
31  
32  
33  
34  
35  
36  
37  
38



1 Supplemental Table 3 compares the heart failure hospitalization (HFH) pre implant and 1-year post-  
 2 implant stratified by the baseline number of HFHs pre-enrollment and stratified by ejection fraction. For  
 3 patients with  $\geq 5$  HFH pre-enrollment (n=21), there were 5.87 events/patient-years before compared  
 4 with 1.79 events/patient-years after implant, resulting in a risk reduction of 70% (HR 0.30, 95% CI 0.19,  
 5 0.48; p <0.0001). For patients with 2-4 pre-enrollment (n=349), there were 2.25 events/patient-years  
 6 before compared with 0.82 events/patient-years after implant, resulting in a risk reduction of 63% (HR  
 7 0.37, 95% CI 0.31, 0.43; p <0.0001). Patients with < 2 HFH pre-enrollment (n=830), there were 0.72  
 8 events/patient-years before compared with 0.39 events/patient-years after implant, resulting in a risk  
 9 reduction of 46% (HR 0.43, 95% CI 0.47, 0.62; p <0.0001).

10  
 11 Although the number of patients in the  $\geq 5$  HFH pre-enrollment group was small (n=21), these findings  
 12 suggest that the benefits of PA pressure guided therapy appear to be more significant for patients that  
 13 were more 'ill' at study entry (i.e. HFH pre-enrollment  $\geq 5$ ).

14 **Supplemental Table 3.** Summary of Change in Pre-Enrollment vs Readmission Heart Failure  
 15 Hospitalizations.

| Number of HFH pre-enrollment        | EF < 40%<br>(N=637)                           | 40% $\leq$ EF $\leq$ 50%<br>(N=198)           | EF > 50%<br>(N=363)                           | All Subjects<br>(N=1200)                      |
|-------------------------------------|-----------------------------------------------|-----------------------------------------------|-----------------------------------------------|-----------------------------------------------|
| <b>Change in HFH by # of Admits</b> |                                               |                                               |                                               |                                               |
| < 2                                 | 0.730 vs. 0.462<br>[422]<br>0.63 (0.53, 0.76) | 0.776 vs. 0.333<br>[139]<br>0.43 (0.29, 0.63) | 0.702 vs. 0.316<br>[269]<br>0.45 (0.33, 0.61) | 0.721 vs. 0.389<br>[830]<br>0.54 (0.47, 0.62) |
| 2 to 4                              | 2.273 vs. 0.838<br>[200]<br>0.37 (0.30, 0.45) | 2.511 vs. 0.879<br>[57]<br>0.35 (0.25, 0.49)  | 2.208 vs. 0.838<br>[90]<br>0.38 (0.28, 0.52)  | 2.247 vs. 0.823<br>[349]<br>0.37 (0.31, 0.43) |
| $\geq 5$                            | 6.104 vs. 2.070<br>[15]<br>0.34 (0.21, 0.55)  | 5.689 vs. 2.276<br>[2]<br>0.40 (0.20, 0.80)   | 6.345 vs. 0.643<br>[4]<br>0.10 (0.01, 0.76)   | 5.874 vs. 1.790<br>[21]<br>0.30 (0.19, 0.48)  |

16  
 17  
 18  
 19  
 20  
 21  
 22  
 23  
 24  
 25  
 26  
 27  
 28  
 29  
 30  
 31  
 32  
 33  
 34

#### Supplemental Table 4. Investigators and Study Sites

| Site Name                                                  | Primary Investigator      |
|------------------------------------------------------------|---------------------------|
| Sanford USD Medical Center                                 | Jonsson, Orvar            |
| Centracare Heart and Vascular Center                       | Pelzel, Jamie             |
| St. Francis Hospital                                       | Jermyn, Rita              |
| Catholic Medical Center                                    | Capodilupo, Robert        |
| First Coast Cardiovascular Institute                       | Zuberi, Omer              |
| University Hospitals Cleveland Medical Center              | Robinson, Monique         |
| Heart Hospital of Austin                                   | Bhatt, Kunjan             |
| Huntington Memorial Hospital                               | Rao, Vyshali              |
| USC University Hospital                                    | Shavelle, David           |
| Providence Hospital                                        | David, Shukri             |
| Scripps Green Hospital                                     | Heywood, Thomas           |
| Aurora Sinai Medical Center                                | Sulemanjee, Nasir         |
| Cardiovascular Institute of the South - Lafayette          | Ayalloore, Siby           |
| Minneapolis Heart Institute                                | Bennett, Mosi             |
| University of Arizona                                      | Juneman, Elizabeth        |
| North Shore University Hospital                            | Stevens, Gerin            |
| Ohio State University                                      | Hasan, Ayesha             |
| McLaren Health Care Corporation                            | Masri, Kalil              |
| Methodist Hospitals Inc                                    | Artis, Andre              |
| Sharp Memorial Hospital                                    | Jaski, Brian              |
| Brigham and Women's Hospital                               | Givertz, Michael          |
| Providence Heart and Vascular Institute                    | Abraham, Jacob            |
| Ventura Cardiology Consultants                             | Kong, Thomas              |
| Advocate Good Samaritan Hospital                           | Valika, Ali               |
| Community Heart and Vascular                               | Safiia, Muhamad Adeeb     |
| Genesis Medical Center                                     | Rajendran, Vijayaraghavan |
| Piedmont Athens Regional Medical Center                    | Marti, Catherine          |
| Mayo Clinic                                                | Redfield, Margaret        |
| University of Kentucky                                     | Guglin, Maya              |
| South Denver Cardiology Associates PC                      | Dauber, Ira               |
| West Virginia University Hospital                          | Sokos, George             |
| Mercy Medical Center                                       | Kassiotis, Chris          |
| NC Heart and Vascular Research                             | Jobe, R. Lee              |
| University Hospital - Univ. of Alabama at Birmingham (UAB) | Tallaj, Jose              |
| University of California at San Francisco                  | Selby, Van                |
| Advocate Health and Hospitals Corporation                  | Costanzo, Maria Rosa      |
| HealthCare Partners Cardiology                             | Ivey, Pamela              |
| Hudson Valley Cardiovascular Practice, P.C.                | Lyons, James              |
| University of Miami Hospital                               | Chaparro, Sandra          |
| Cedars-Sinai Medical Center                                | Czer, Lawrence            |

**Site Name**

Munson Medical Center  
Advanced Heart Care Associates  
Lancaster General Hospital  
Aspirus Wausau Hospital  
Gundersen Lutheran Medical Center  
Stamford Hospital  
Vidant Medical Center  
Cardiac Rhythm Specialists, Inc.  
East Tennessee Heart Consultants  
Eisenhower Medical Center  
Heart Rhythm Specialists  
Swedish Medical Center - Heart & Vascular  
Vanderbilt University Medical Center  
Heart Care Centers of Illinois - Palos Park  
King's Daughters Medical Center  
Mayo Clinic Scottsdale  
Northeast Ohio Cardiovascular Specialists  
Northshore University HealthSystem  
Penn State Milton S. Hershey Medical Center  
The Cardiac & Vascular Institute Research Foundation, LLC  
University of Colorado Hospital  
Renown Regional Medical Center  
Arizona Arrhythmia Research Center  
Atlantic Health System - Morristown Memorial Hospital  
John C. Lincoln North Mountain Hospital  
Northwestern Memorial Hospital  
Ochsner Medical Center  
The Lindner Center  
Fairview Southdale Hospital  
Heart Center Research, LLC.  
Kansas University Medical Center  
Mercy Hospital St. Louis  
Scott & White Memorial Hospital  
Spartanburg Regional Medical Center  
Spectrum Health Butterworth Hospital  
Sutter Medical Center, Sacramento  
The Reading Hospital and Medical Center  
Torrance Memorial Medical Center  
Abington Memorial Hospital  
Allegheny General Hospital - ASRI  
Barnes-Jewish Hospital

**Principle Investigator**

Recchia, Dino  
Spaccavento, Leo  
Roberts, Justin  
Luetmer, Paul  
Bird, Julio  
Hsi, David  
Alhosaini, Hassan  
Polosajian, Leo  
Foster, Malcolm  
Feldman, Leon  
McKenzie, John  
Mignone, John  
Schlendorf, Kelly  
Macaluso, Gregory  
Van Deren, John  
Hardaway, Brian  
Costantini, Ottorino  
Gordon, Robert  
Boehmer, John  
Tong, Ann  
Altman, Natasha  
To, Thomas  
Swarup, Vijendra  
Goldschmidt, Marc  
Seifert, Mark  
Anderson, Allen  
Ventura, Hector  
Egnaczyk, Gregory  
Jama, Abdi  
Murphy, James  
Sauer, Andrew  
Czarnik, Bruce  
Hicks, Albert  
Rodak, David  
Dickinson, Michael  
Xu, Zi-Jian  
Green, Jared  
Shin, Victoria  
Watson, Robert  
Benza, Raymond  
Vader, Justin

**Site Name**

Covenant HealthCare  
Gwinnett Medical Center  
Hoag Memorial Hospital Presbyterian  
Massachusetts General Hospital  
Mount Sinai Hospital  
Albany Medical College at Albany Med. Ctr.  
Florida Hospital  
Huntsville Cardiovascular Clinic  
Lehigh Valley Hospital - 17th Street  
Main Line Health Center/Lankenau Hospital  
Medical City Dallas Hospital  
Medical University of South Carolina  
New Jersey Cardiology Associates  
California Pacific Medical - Ctr. Pacific Campus  
Centennial Medical Center  
Hawaii Pacific Health  
LSU Health Sciences Center  
Presbyterian Hospital  
Rapid City Regional Hospital  
Sutter Gould Medical Foundation - Briggsmore Spec. Center  
The Cleveland Clinic Foundation  
Winthrop-University Hospital

**Principle Investigator**

Jundi, Mayar  
Lipsitt, Michael  
Itchhaporia, Dipti  
Thomas, Sunu  
Moss, Noah  
Philbin, Edward  
Raval, Nirav  
Strickland, Warren  
Islam, Nauman  
Droogan, Christopher  
Chemmalakuzhy, Jacob  
Steinberg, Daniel  
Rubenstein, Donald  
Herr, Jared  
Johnston, Thomas  
Kao, John  
Dominic, Paari  
McMillan, Edward  
Heilman, K  
Tsai, Charles  
Jacob, Miriam  
Marzo, Kevin

1  
2  
3  
4  
5  
6  
7  
8  
9  
10  
11  
12  
13  
14  
15
